# Supplementary material for: Liposomal Irinotecan for Treatment of Colorectal Cancer in a Preclinical Model
Source: PubMed Central journal article supplement (PMC6468623; doi:10.3390/cancers11030281), 2019-02-27

# Supplementary Materials: Liposomal Irinotecan for Treatment of Colorectal Cancer in a Preclinical Model

Jiao-Ren Huang, Mei-Hsien Lee, Wen-Shan Li and Han-Chun Wu

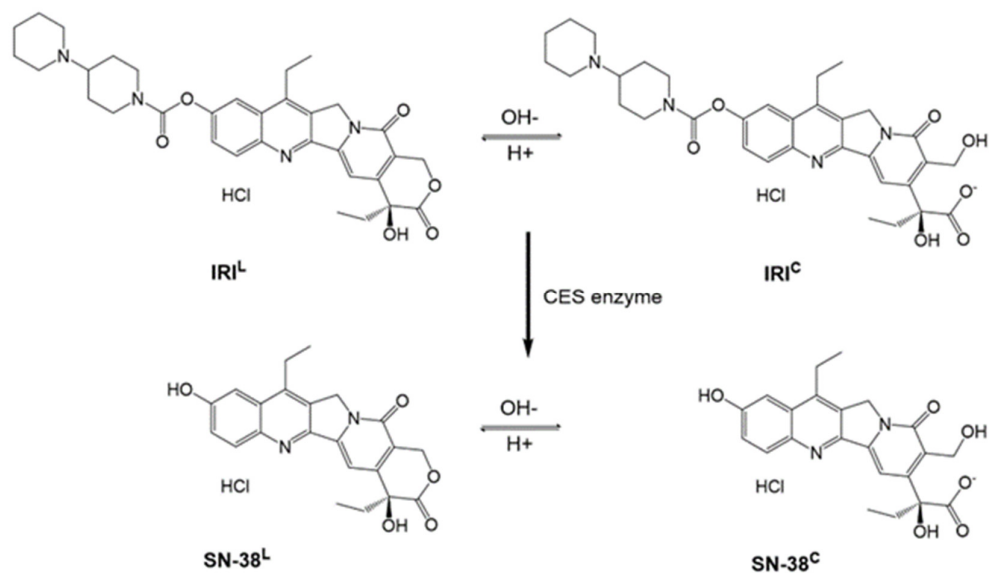

**Figure S1.** The structures of irinotecan and SN-38. Irinotecan (IRI) exists in a pH-dependent reversible equilibrium between closed active lactone and open inactive carboxylate conformations. The lactone form of IRI (IRI<sup>L</sup>) is predominant in acidic conditions, whereas the carboxyl form of IRI (IRI<sup>C</sup>) exists mainly in basic environments. SN-38 is a major metabolite of IRI, which is converted by carboxylesterase (CES) enzyme.

**A**

|              | IC <sub>50</sub> [μM] | IRI   | SN-38 |
|--------------|-----------------------|-------|-------|
| A549         | 36.39                 | 1.475 |       |
| CL1-5        | 47.01                 | 0.196 |       |
| SK-HEP-1     | 13.58                 | 3.672 |       |
| Ca9-22       | 43.17                 | 0.110 |       |
| HCT 116      | 25.37                 | 0.175 |       |
| PC-3         | 76.81                 | 0.634 |       |
| MCF-7        | 129.08                | 0.510 |       |
| MIA PaCa - 2 | 58.28                 | 0.444 |       |

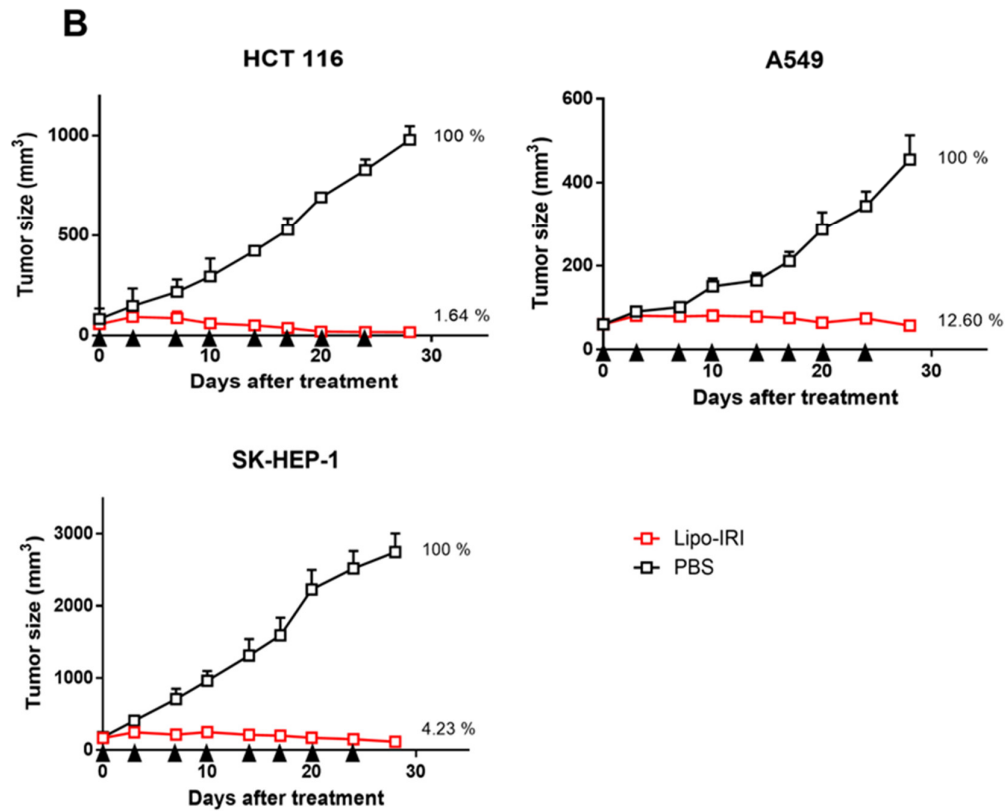

**Figure S2.** Cytotoxicity in vitro and tumor response in vivo. **(A)** Cell viability was evaluated by MTT assay. IC<sub>50</sub> values were calculated with GraphPad Prism 6.0 software. **(B)** NOD/SCID mice were inoculated with HCT 116, A549 or SK-HEP-1 cell lines. Tumor-bearing mice received 10 mg/kg Lipo-IRI i.v. through the tail vein twice per week.

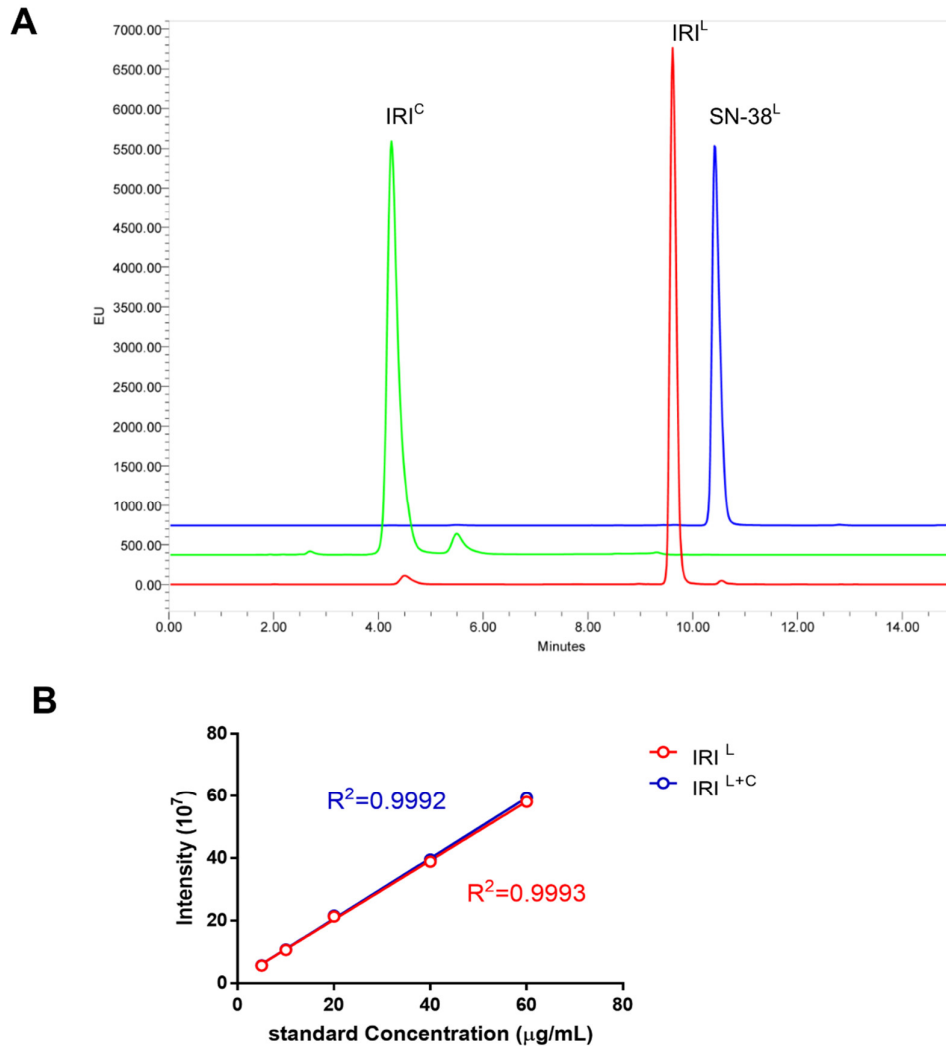

**Figure S3.** Chromatogram of IRI and SN-38. (A) HPLC separation of IRI lactone and carboxylate species. Chromatography conditions were as follows. Mobile phase: ACN-TEAA (3%, pH 5.5.) from 20:80 to 70:30 in 15 min. Flow rate: 0.9 mL/min. Fluorescence detector was operated at excitation 375 nm and emission 500 nm. IRI<sup>L</sup>, IRI<sup>C</sup> and SN-38<sup>L</sup> are shown as red, green, and blue lines, respectively. (B) A calibration curve for the IRI standard was analyzed and plotted.  $R^2 = 0.993$  for the lactone and 0.992 for total.

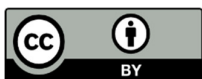

Supplement: cancers-11-00281-s001.pdf [file cancers-11-00281-s001.pdf]
